# Supplementary material for: Forming layered conjugated porous BBL structures
Source: Royal Society of Chemistry journal article supplement (doi:10.1039/c9py00840c), 2019-01-01
Supplement: c9py00840c1.pdf [file c9py00840c1.pdf]

Supporting Information

## Forming Layered Conjugated Porous BBL Structures

*Sun-Hee Shin, Hyuk-Jun Noh, Young-Hyun Kim, Yoon-Kwang Im, Javeed Mahmood\* and Jong-Beom Baek\**

School of Energy and Chemical Engineering, Center for Dimension-Controllable Organic Frameworks, Ulsan National Institute of Science and Technology (UNIST), 50 UNIST, Ulsan 44919, South Korea

\* To whom correspondence should be addressed. E-mail: [jbbaek@unist.ac.kr](mailto:jbbaek@unist.ac.kr), [javeed@unist.ac.kr](mailto:javeed@unist.ac.kr) Tel: +82-52-217-2510; Fax: +82-52-217-2639

**KEYWORDS:** Poly(benzoimidazobenzophenanthroline, BBL), ladder structure, fused organic network, high  $Q_{st}$  gas adsorption

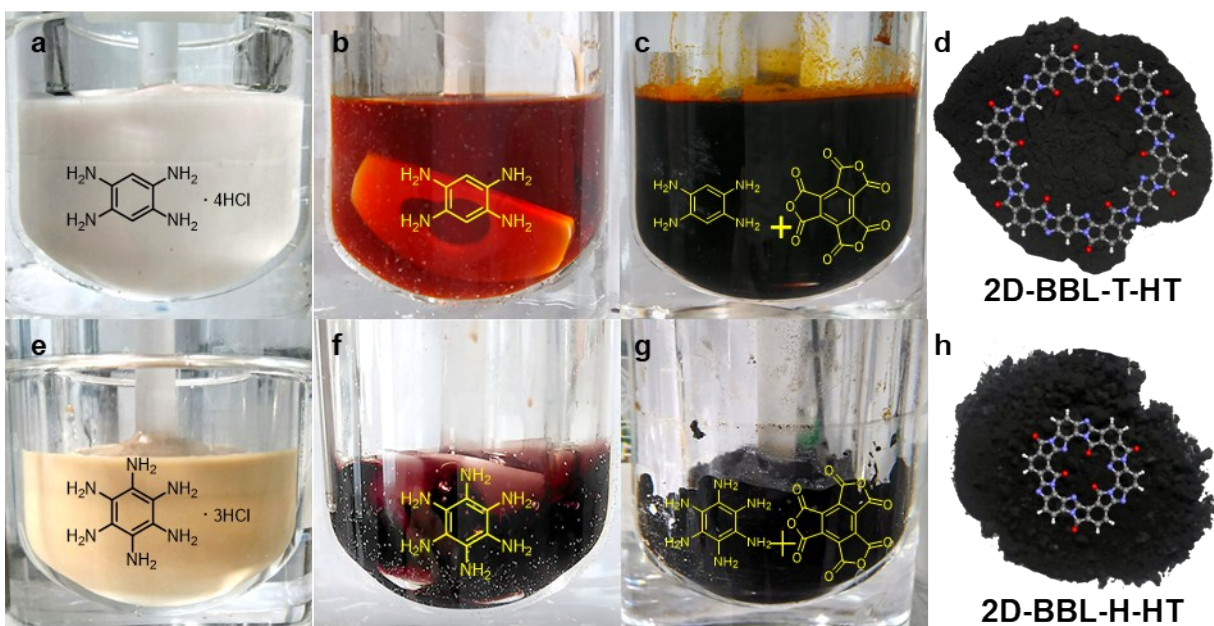

**Fig. S1.** Photographs taken during the synthesis of 2D-BBL-T and 2D-BBL-H; **(a)** Tetraaminobenzene (TAB) tetrahydrochloride in PPA at room temperature, **(b)** after complete dehydrochlorination, the color of media changed from white to orange and transparent. **(c)** Polymerization with mellitic trianhydride (MTA) at 175 °C. **(d)** Photograph of as-synthesized 2D-BBL-T-HT. **(e)** Hexaaminobenzene (HAB) trihydrochloride in PPA at room temperature, **(f)** after complete dehydrochlorination, the color of media changed from light brown to red and transparent. **(g)** Polymerization with mellitic trianhydride (MTA) at 175 °C. **(h)** Photograph of as-synthesized 2D-BBL-H-HT.

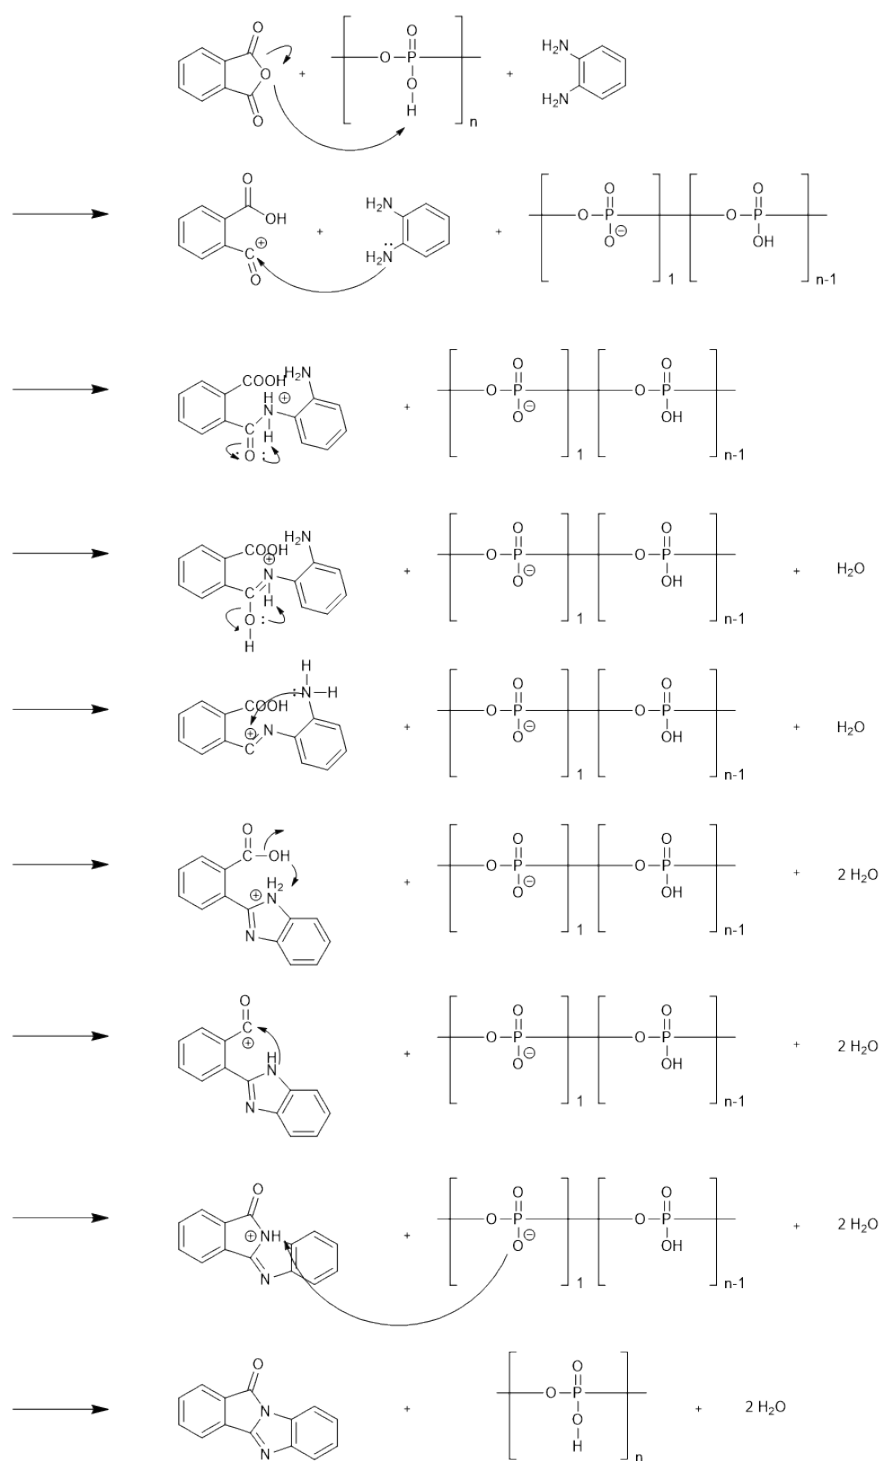

**Fig. S2.** The condensation mechanism for the formation of benzimidazobenzophenanthroline compounds in polyphosphoric acid (PPA), which plays as acid catalyst for dehydration and polar solvent for polymer.

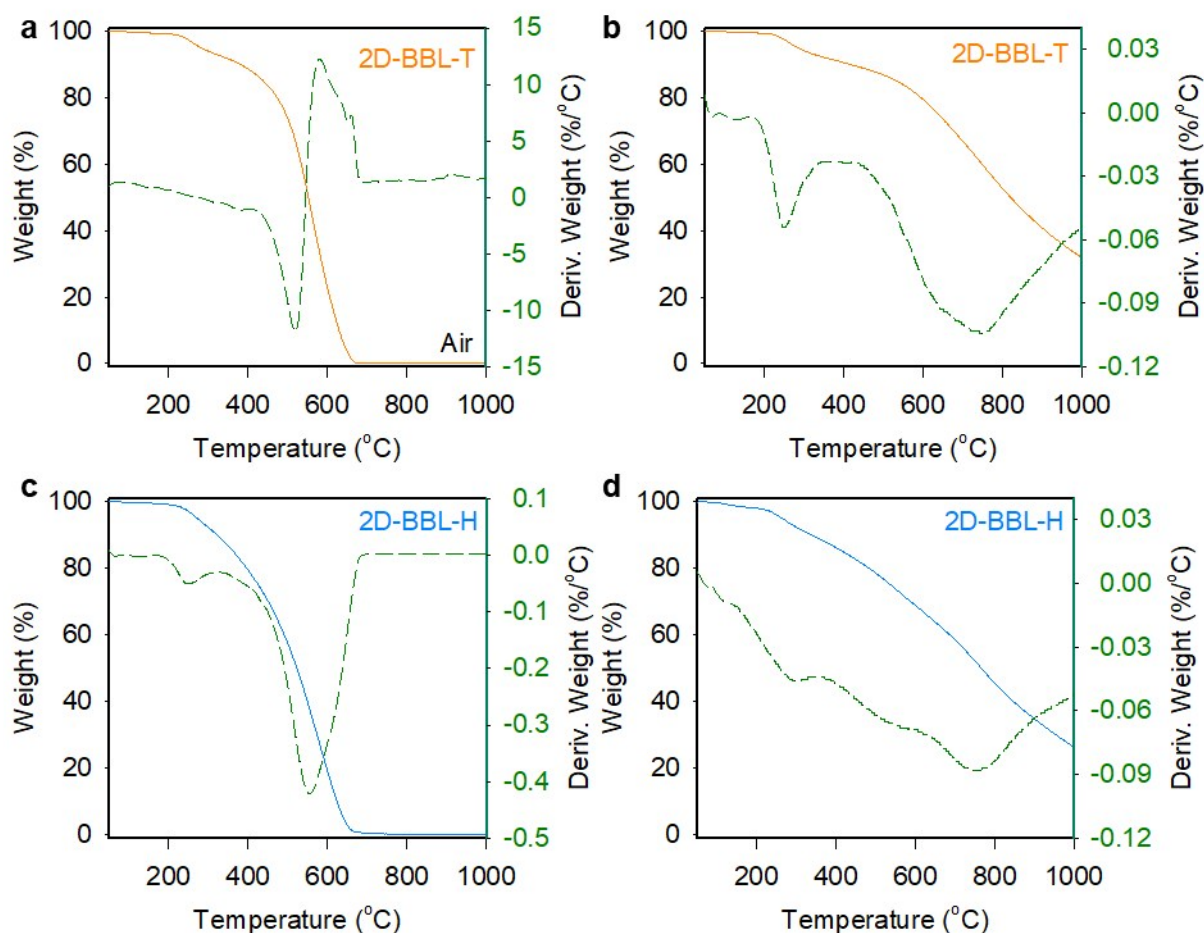

**Fig. S3.** TGA thermograms of 2D-BBL-T and 2D-BBL-H obtained with the ramping rate of  $10\text{ }^{\circ}\text{C min}^{-1}$ : (a, c) in air, (b, d) in nitrogen. In both air and nitrogen atmosphere, Heat-treated samples, 2D-BBL-T-HT and 2D-BBL-H-HT (Figure 1a, b) displayed significantly improved thermal stability, due to the removal of periphery amine ( $-\text{NH}_2$ ) and carboxylic acid ( $-\text{COOH}$ ) groups.

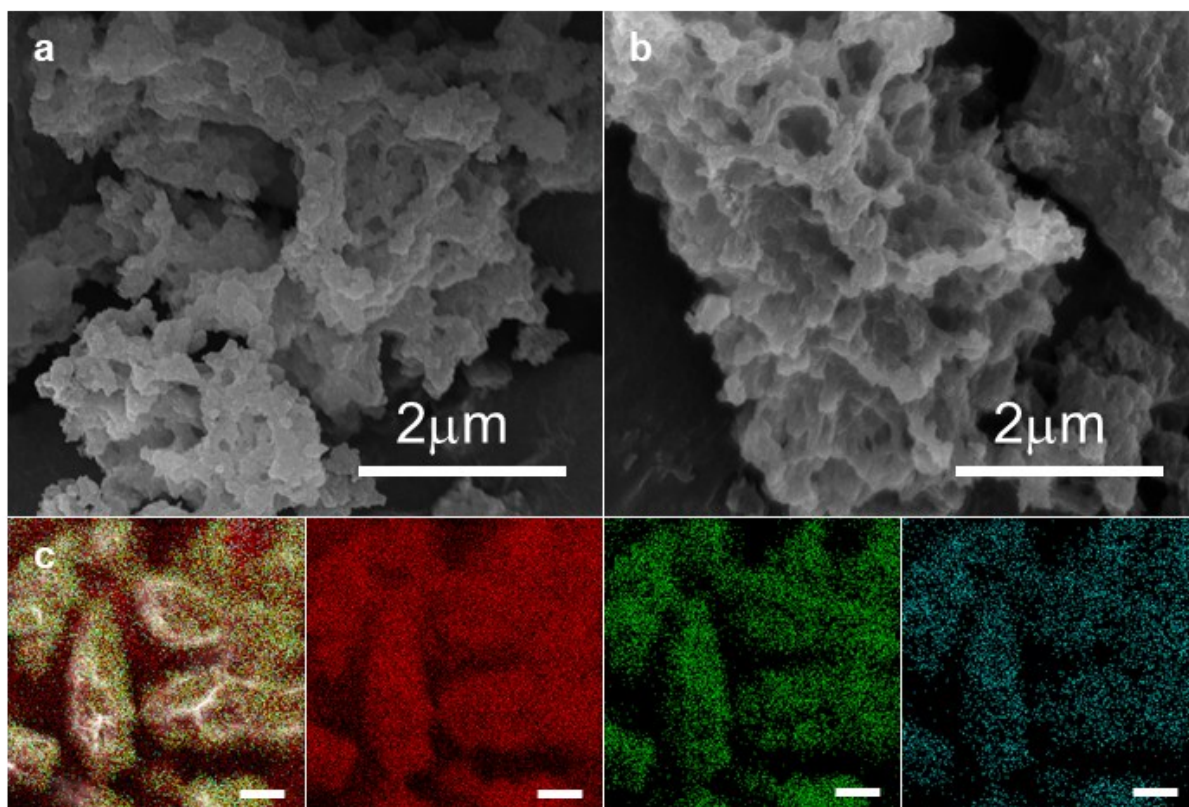

**Fig. S4.** SEM images: (a) 2D-BBL-T, (b) 2D-BBL-T-HT, (c) SEM image of 2D-BBL-T-HT with element mappings for all elements (red, green and cyan), carbon (red), nitrogen (green) and oxygen (cyan) in that order. Scale bars are 2 μm.

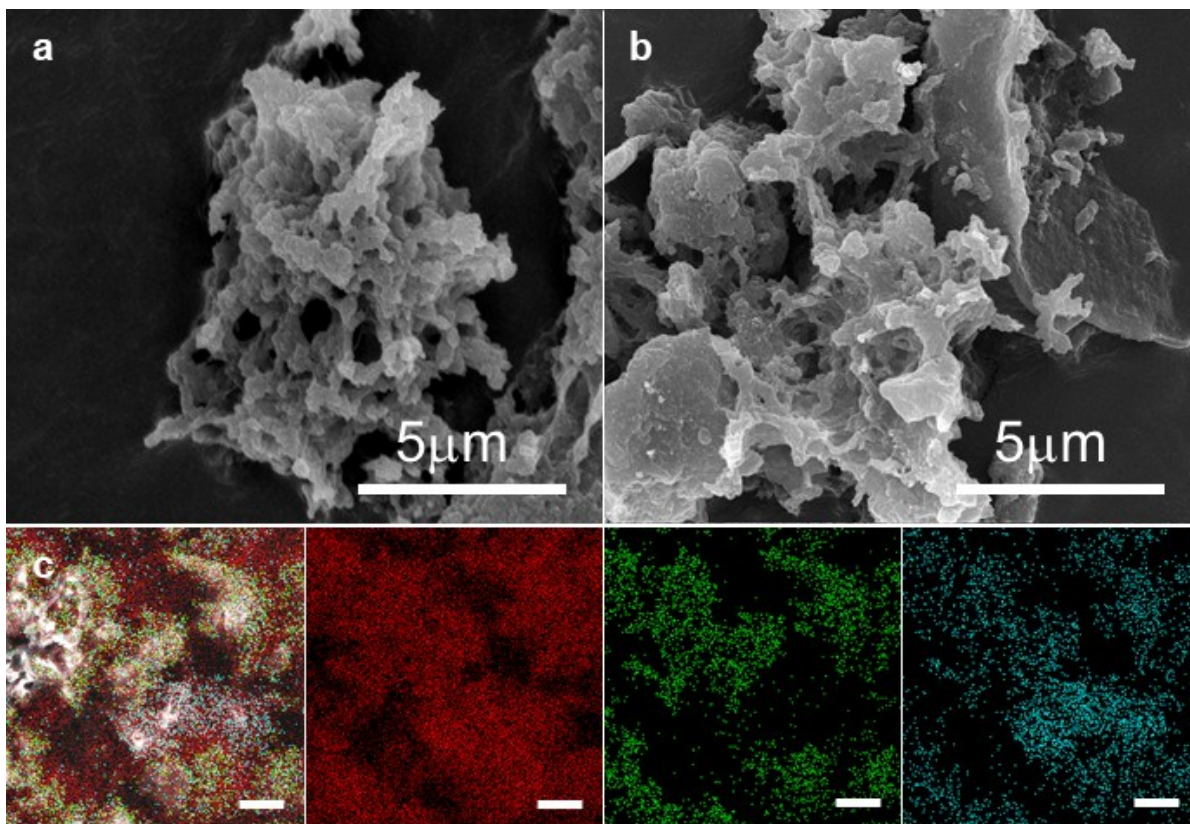

**Fig. S5.** SEM images: (a) 2D-BBL-H, (b) 2D-BBL-H-HT, (c) SEM image of 2D-BBL-H-HT with element mappings for all elements (red, green and cyan), carbon (red), nitrogen (green) and oxygen (cyan) in that order. Scale bars are 2  $\mu\text{m}$ .

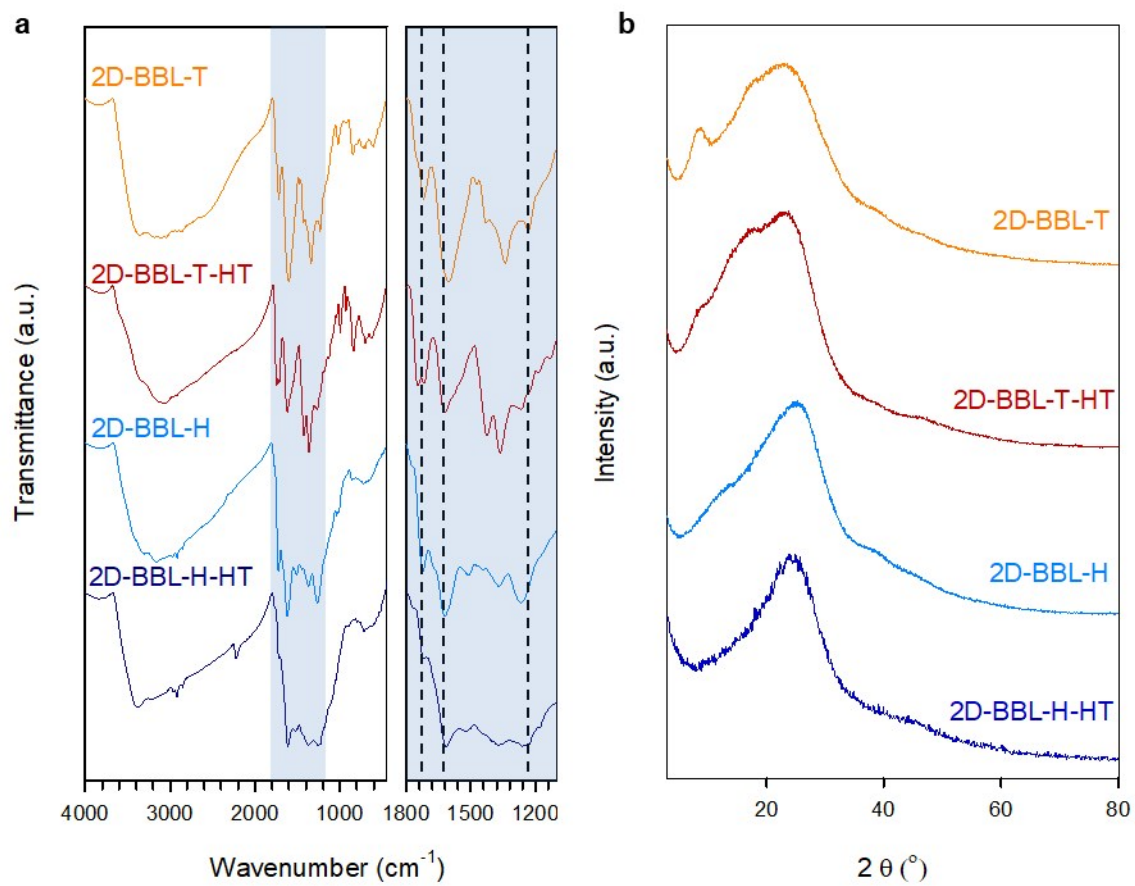

**Fig. S6.** FT-IR full spectra and (b) PXRD patterns for 2D-BBL-T, 2D-BBL-T-HT, 2D-BBL-H and 2D-BBL-H-HT.

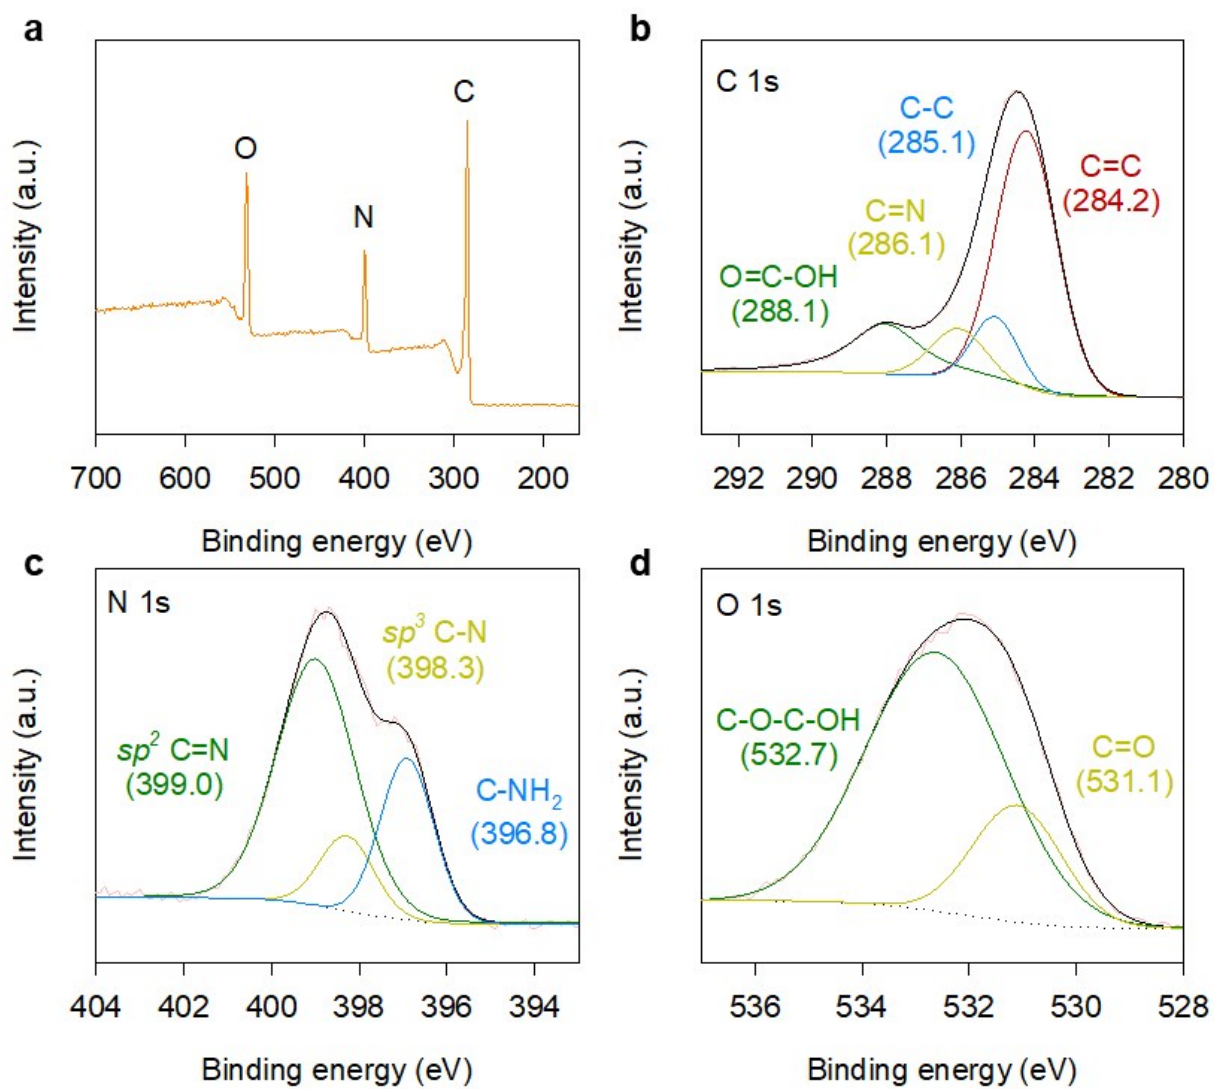

**Fig. S7.** XPS survey spectra of 2D-BBL-T: (a) Full spectra, (b) C 1s, (c) N 1s and (d) O 1s.



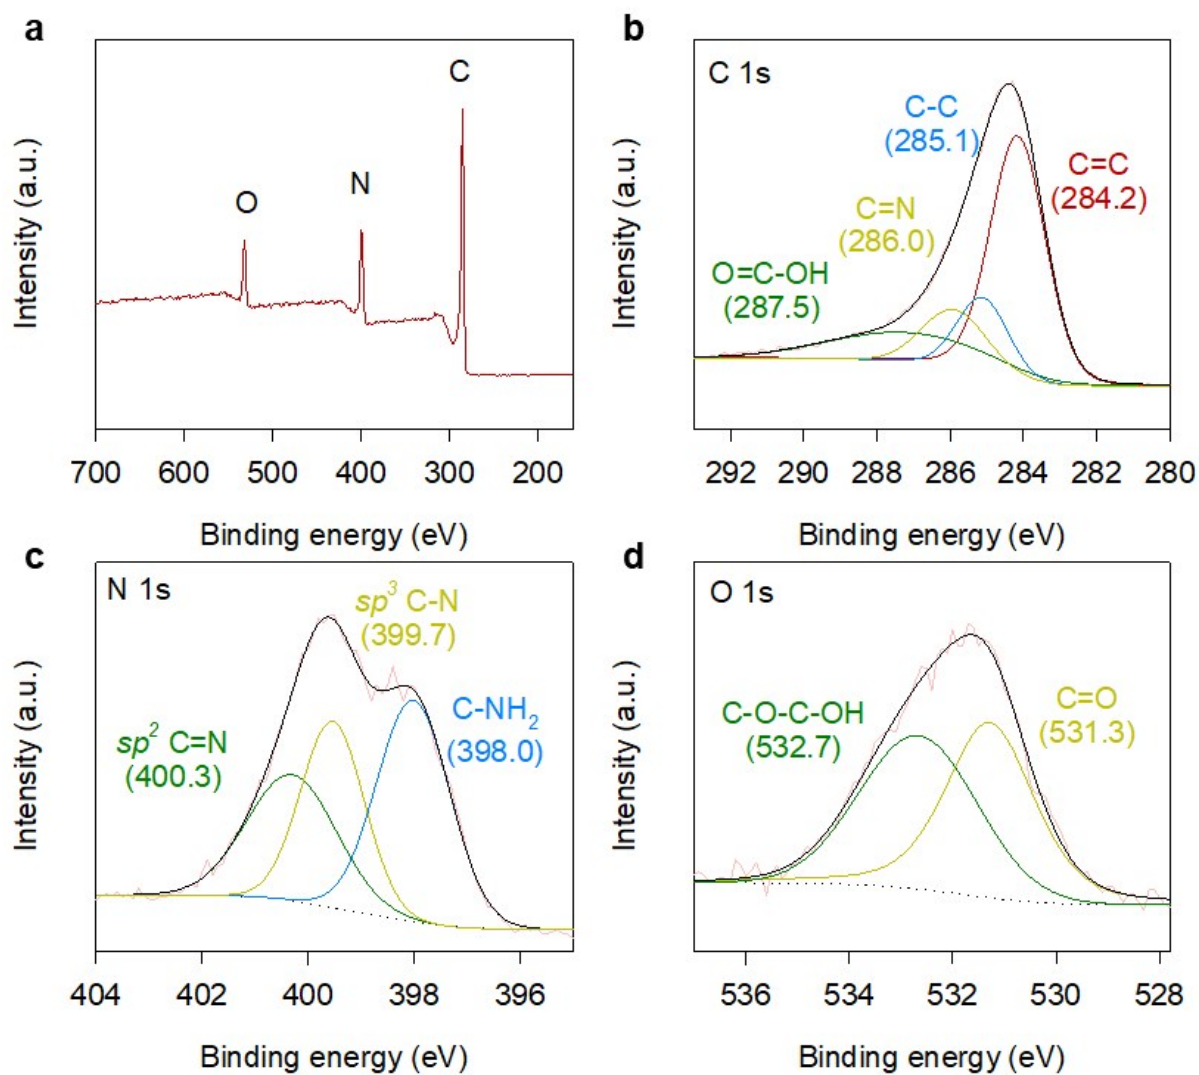

**Fig. S8.** XPS survey spectra of 2D-BBL-T-HT: (a) Full spectra, (b) C 1s, (c) N 1s and (d) O 1s.

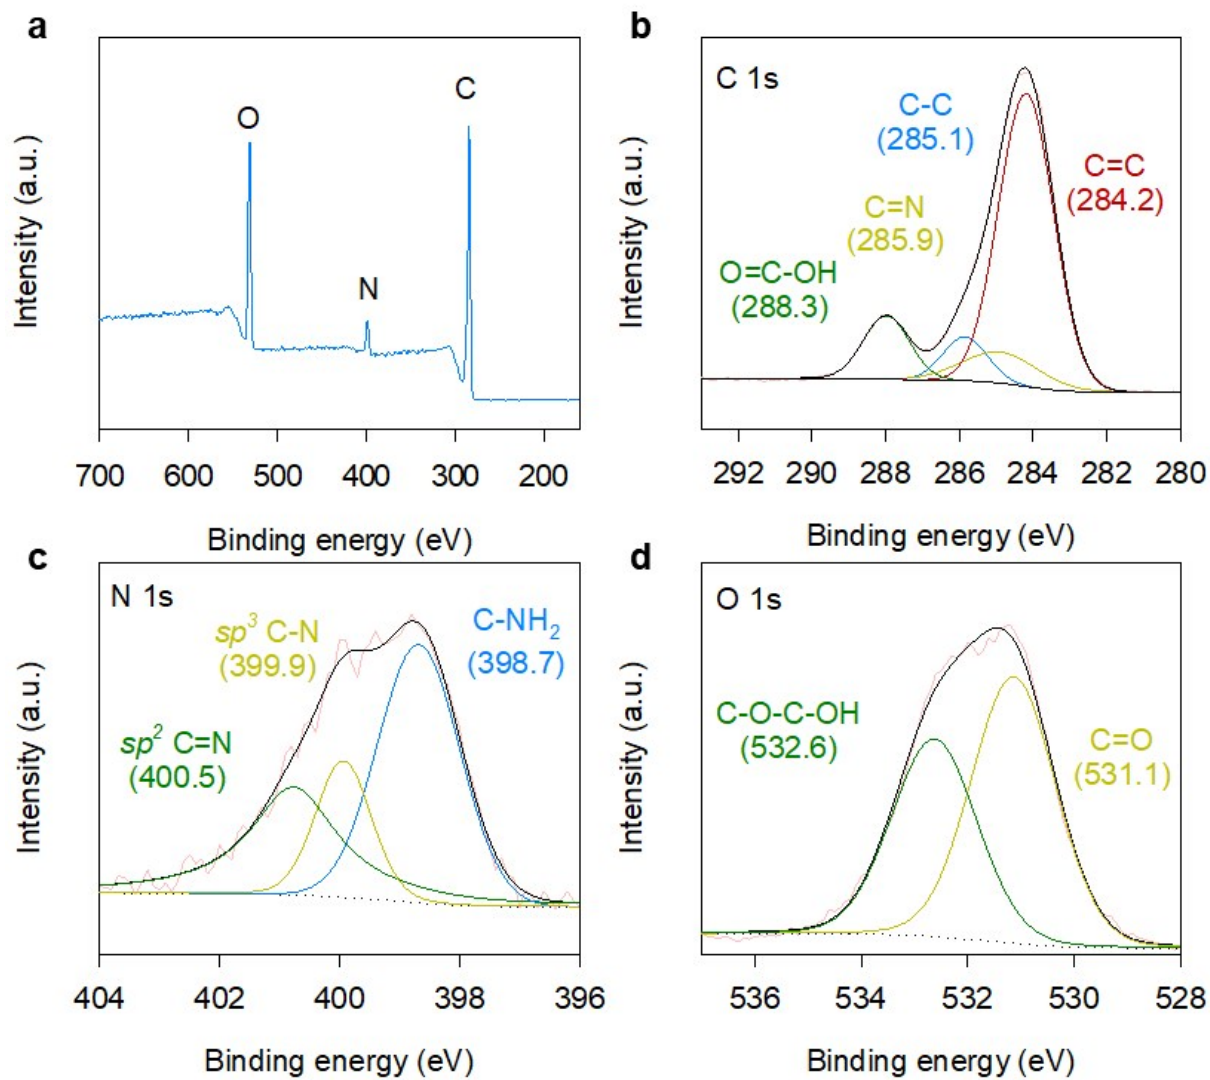

**Fig. S9.** XPS survey spectra of 2D-BBL-H: (a) Full spectra, (b) C 1s, (c) N 1s and (d) O 1s.

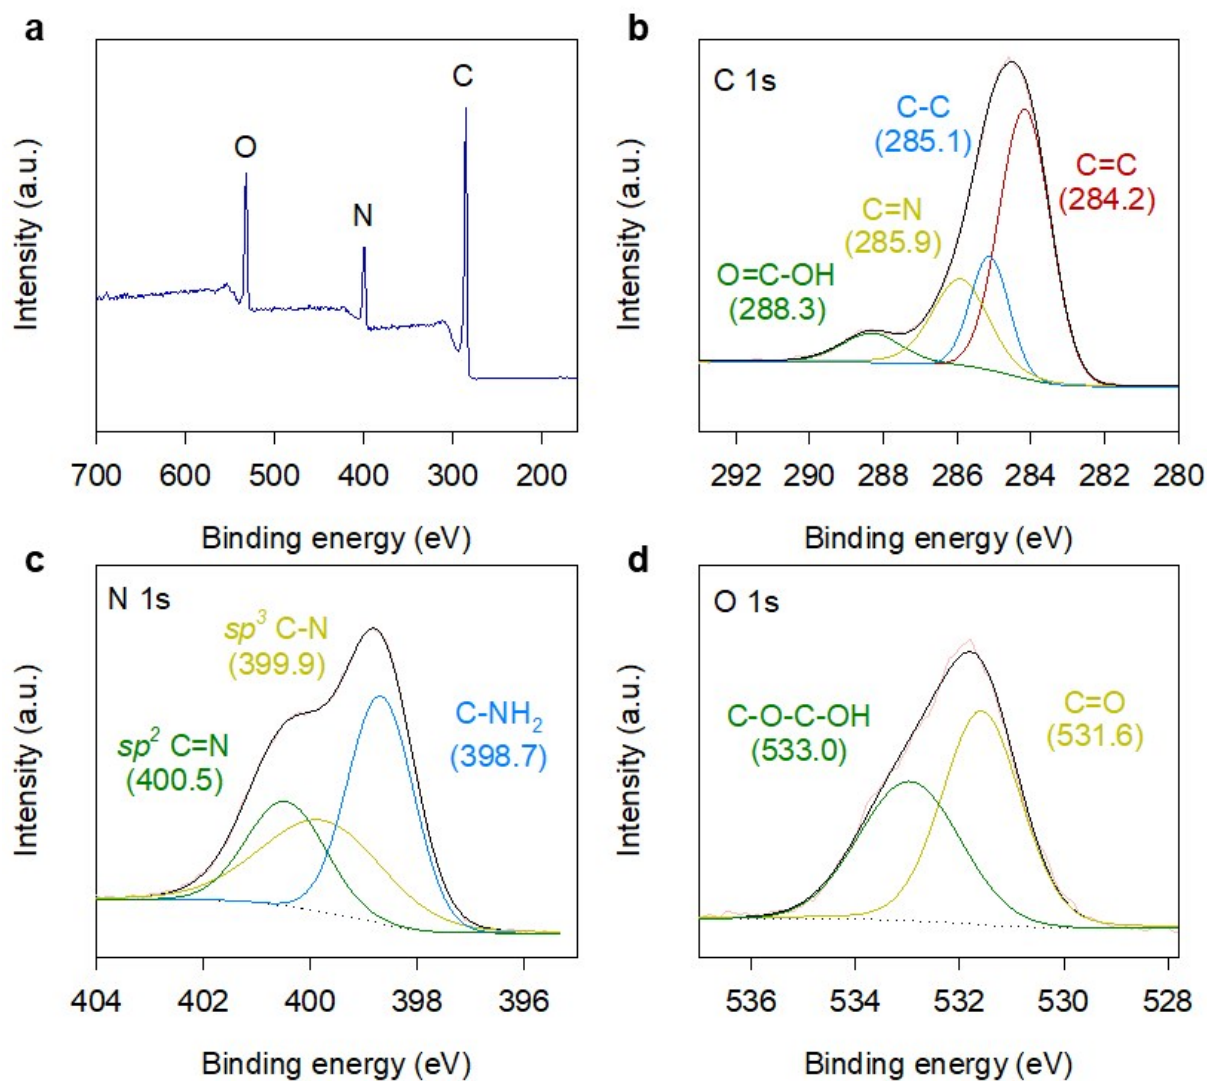

**Fig. S10.** XPS survey spectra of 2D-BBL-H-HT: (a) Full spectra, (b) C 1s, (c) N 1s and (d) O 1s.

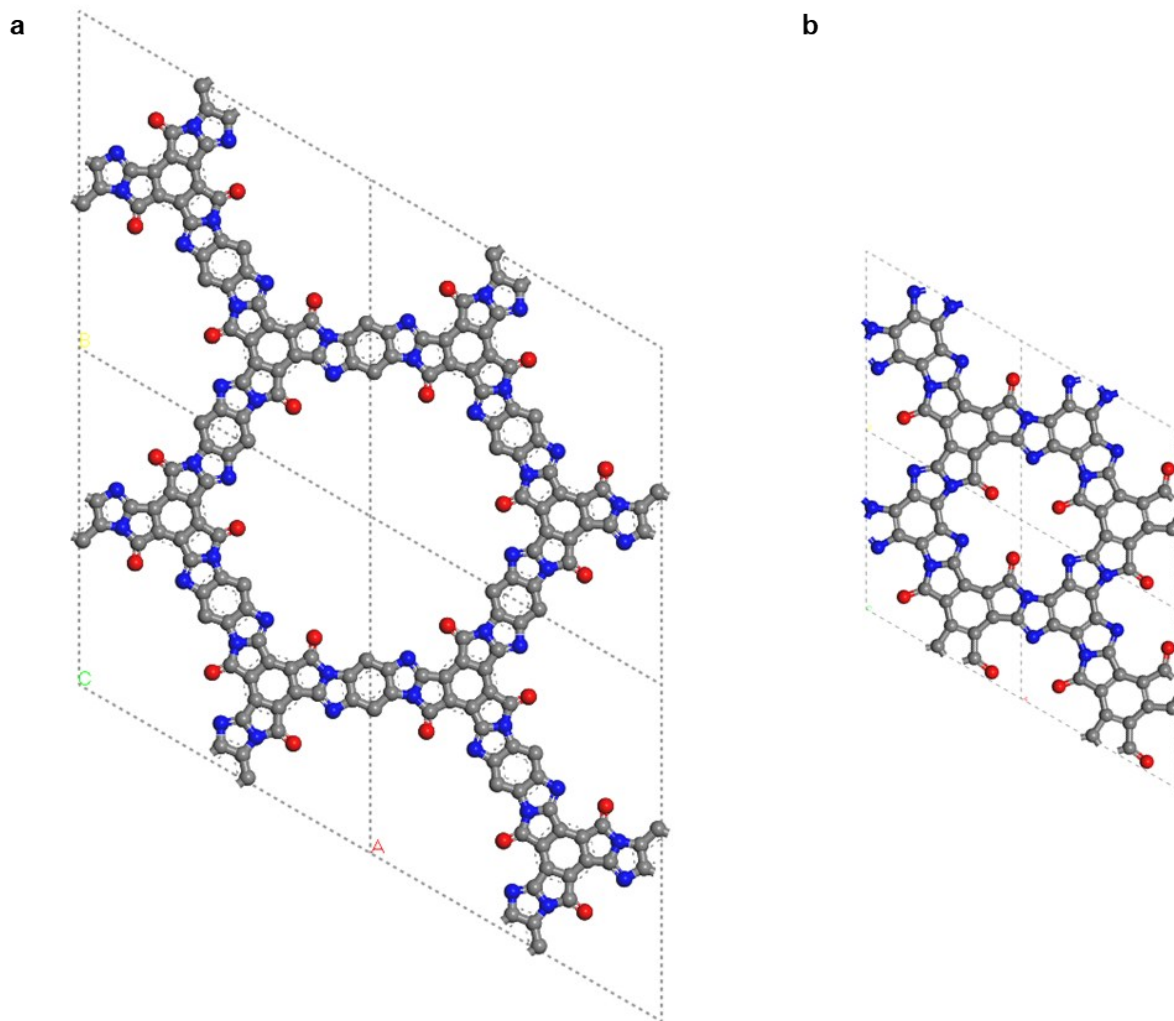

**Fig. S11.** Simulated unit cell structures: (a) 2D-BBL-T-HT and (b) 2D-BBL-H-HT (C, grey; N, blue; O, red).

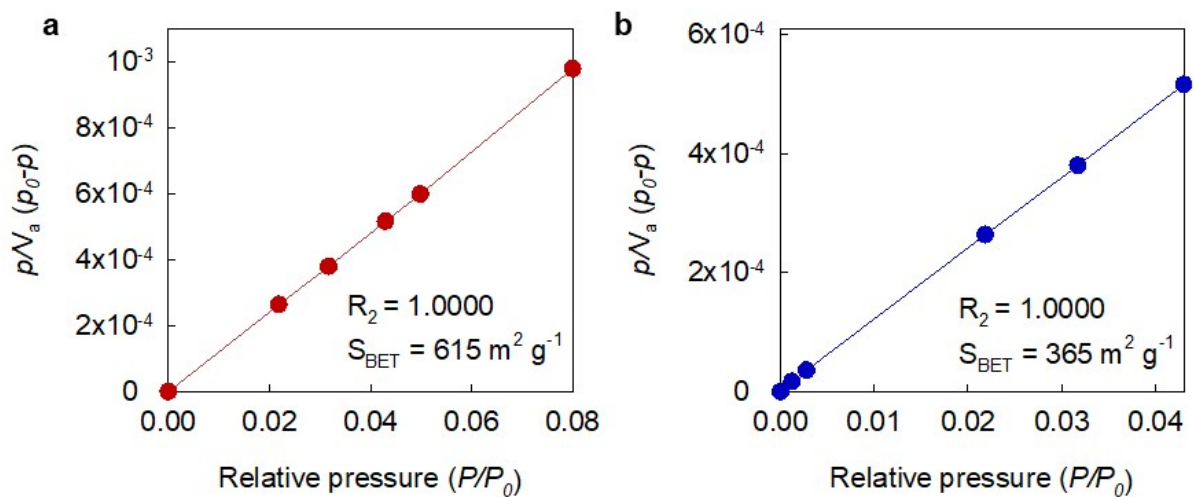

**Fig. S12.** BET plot of (a) 2D-BBL-T-HT and (b) 2D-BBL-H-HT at 77 K using nitrogen as adsorbate.

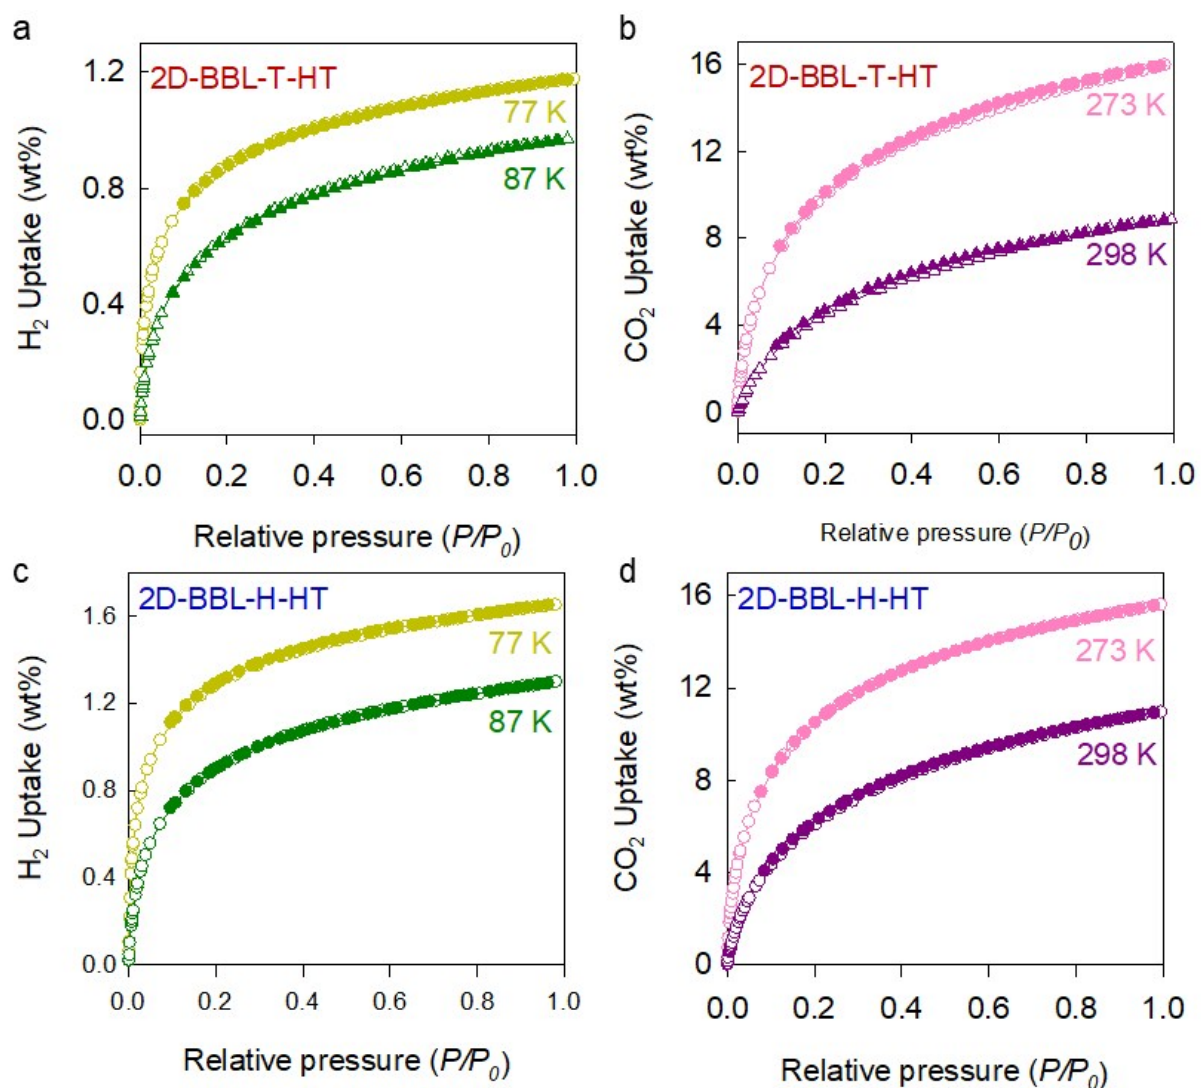

**Fig. S13.** Permanent porosities of 2D-BBL-T-HT: (a) H<sub>2</sub> adsorption-desorption isotherms at 77 K and 87 K, (b) CO<sub>2</sub> adsorption-desorption isotherms at 273 K and 298 K. Permanent porosities of 2D-BBL-H-HT: (c) H<sub>2</sub> adsorption-desorption isotherms at 77 K and 87 K, (d) CO<sub>2</sub> adsorption-desorption isotherms at 273 K and 298 K.

**Table S1** | Elemental compositions of 2D-BBL-T and 2D-BBL-T-HT from various analytical techniques

|                    | <b>Element</b>              | <b>C</b> | <b>N</b> | <b>O</b> | <b>H</b> | <b>C/N ratio</b> |
|--------------------|-----------------------------|----------|----------|----------|----------|------------------|
| <b>2D-BBL-T</b>    | Theoretical (wt.%)          | 65.13    | 21.70    | 12.39    | 0.78     | 3.00             |
|                    | XPS (wt. %) <sup>a</sup>    | 66.18    | 14.36    | 19.46    | -        | 4.60             |
|                    | EA (wt. %)                  | 49.05    | 16.62    | 30.52    | 3.74     | 2.95             |
|                    | SEM EDS (wt.%) <sup>b</sup> | 61.93    | 14.50    | 23.57    | -        | 4.27             |
| <b>2D-BBL-T-HT</b> | Theoretical (wt.%)          | 65.13    | 21.70    | 12.39    | 0.78     | 3.00             |
|                    | XPS (wt. %)                 | 71.57    | 18.77    | 9.66     | -        | 3.81             |
|                    | EA (wt. %)                  | 60.00    | 20.75    | 12.25    | 3.20     | 2.89             |
|                    | SEM EDS (wt.%)              | 63.96    | 15.13    | 20.91    | -        | 4.23             |

a, b: more sensitive to surface chemical composition.

**Table S2** | Elemental compositions of 2D-BBL-H and 2D-BBL-H-HT from various analytical techniques

|                    | <b>Element</b>             | <b>C</b> | <b>N</b> | <b>O</b> | <b>H</b> | <b>C/N ratio</b> |
|--------------------|----------------------------|----------|----------|----------|----------|------------------|
| <b>2D-BBL-H</b>    | Theoretical (wt.%)         | 65.13    | 21.70    | 12.39    | 0.78     | 3.00             |
|                    | XPS (wt. %) <sup>a</sup>   | 66.94    | 6.52     | 26.54    | -        | 10.27            |
|                    | EA (wt. %)                 | 49.47    | 16.66    | 27.30    | 3.25     | 2.97             |
|                    | SEM EDS(wt.%) <sup>b</sup> | 54.48    | 14.02    | 31.50    | -        | 3.88             |
| <b>2D-BBL-H-HT</b> | Theoretical (wt.%)         | 65.13    | 21.70    | 12.39    | 0.78     | 3.00             |
|                    | XPS (wt. %)                | 66.69    | 14.91    | 18.40    | -        | 4.47             |
|                    | EA (wt. %)                 | 55.37    | 23.01    | 18.48    | 2.52     | 2.40             |
|                    | SEM EDS(wt.%)              | 58.61    | 19.11    | 22.28    | -        | 3.07             |

a, b: more sensitive to surface chemical composition.



**Table S3** | Comparison of the heat of adsorption of CO<sub>2</sub> by different materials

| Class                  | Adsorbent Material      | Pressure (atm) | Temperature (°C) | Qst (kJ mol <sup>-1</sup> ) | References      |
|------------------------|-------------------------|----------------|------------------|-----------------------------|-----------------|
| Porous polymers        | 2D-BBL-T-HT             | 1              | 25               | 37.80                       | This work       |
|                        | 2D-BBL-H-HT             | 1              | 25               | 44.43                       |                 |
|                        | HCP                     | 1.13           | 25               | 23.5                        | S <sup>1</sup>  |
|                        | AAM-Silica              | 45             | 0.1              | 37                          | S <sup>2</sup>  |
|                        | 3D-CON                  | 1              | 25               | 31.87                       | S <sup>3</sup>  |
|                        | GO frameworks           | 4.0            | 25               | 35                          | S <sup>4</sup>  |
|                        | <i>p</i> -CTF-1         | 1              | 25               | 30.7                        | S <sup>5</sup>  |
| Carbon-based Materials | Leather derived AC      | 1              | 35               | 8                           | S <sup>6</sup>  |
|                        | AC                      | 1              | 25               | 3                           | S <sup>7</sup>  |
|                        | AC (ZL-30)              | 1              | 25               | 10.5                        | S <sup>8</sup>  |
| MOFs                   | Ni(dobdc)               | 1              | 25               | 31.2                        | S <sup>9</sup>  |
|                        | Pd(2-pymo) <sub>2</sub> | 0.5            | 25               | 26                          | S <sup>10</sup> |
|                        | Mg-MOF-74               | 1              | 25               | 47                          | S <sup>11</sup> |
|                        | B100-1000               | 1              | 25               | 33.9                        | S <sup>12</sup> |
|                        | MOF1                    | 1              | 25               | 35.4                        | S <sup>13</sup> |
|                        | Bio-MOF-1               | 1              | 15               | 31.2                        | S <sup>14</sup> |
| Zeolites               | SAPO-34                 | 0.1            | 25               | 39.4                        | S <sup>15</sup> |
|                        | Zeolite T               | 0.1            | 25               | 33.6                        | S <sup>15</sup> |
|                        | Commercial Zeolite      | 1              | 25               | 30                          | S <sup>7</sup>  |

## References

- S1. C. F. Martín, E. Stöckel, R. Clowes, D. J. Adams, A. I. Cooper, J. J. Pis, F. Rubiera and C. Pevida, *J. Mater. Chem.*, 2011, **21**, 5475-5483.
- Y. Zhao, Y. Shen, L. Bai and S. Ni, *Appl. Surf. Sci.*, 2012, **261**, 708-716.
- J. Mahmood, S.-J. Kim, H.-J. Noh, S.-M. Jung, I. Ahmad, F. Li, J.-M. Seo and J.-B. Baek, *Angew. Chem. Int. Ed.*, 2018, **57**, 3415-3420.
- S. Gadipelli and Z. X. Guo, *Prog. Mater. Sci.*, 2015, **69**, 1-60.

5. Y. Soo-Young, M. Javeed, N. Hyuk-Jun, S. Jeong-Min, J. Sun-Min, S. Sun-Hee, I. Yoon-Kwang, J. In-Yup and B. Jong-Beom, *Angew. Chem. Int. Ed.*, 2018, **57**, 8438-8442.
6. J. Bermúdez, P. Dominguez, A. Arenillas, J. Cot, J. Weber and R. Luque, *Materials*, 2013, **6**, 4641-4653.
7. M. Radosz, X. Hu, K. Krutkramelis and Y. Shen, *Ind. Eng. Chem. Res.*, 2008, **47**, 3783-3794.
8. B. Guo, L. Chang and K. Xie, *J. Nat. Gas Chem.*, 2006, **15**, 223-229.
9. W. L. Queen, M. R. Hudson, E. D. Bloch, J. A. Mason, M. I. Gonzalez, J. S. Lee, D. Gygi, J. D. Howe, K. Lee, T. A. Darwish, M. James, V. K. Peterson, S. J. Teat, B. Smit, J. B. Neaton, J. R. Long and C. M. Brown, *Chem. Sci.*, 2014, **5**, 4569-4581.
10. A. Ö. Yazaydın, R. Q. Snurr, T.-H. Park, K. Koh, J. Liu, M. D. LeVan, A. I. Benin, P. Jakubczak, M. Lanuza, D. B. Galloway, J. J. Low and R. R. Willis, *J. Am. Chem. Soc.*, 2009, **131**, 18198-18199.
11. S. R. Caskey, A. G. Wong-Foy and A. J. Matzger, *J. Am. Chem. Soc.*, 2008, **130**, 10870-10871.
12. H. R. Kim, T.-U. Yoon, S.-I. Kim, J. An, Y.-S. Bae and C. Y. Lee, *RSC Adv.*, 2017, **7**, 1266-1270.
13. S. S. Dhankhar and C. M. Nagaraja, *New J. Chem.*, 2018, DOI: 10.1039/C8NJ04947E.
14. J. An and N. L. Rosi, *J. Am. Chem. Soc.*, 2010, **132**, 5578-5579.
15. M. Salmasi, S. Fatemi, M. Doroudian Rad and F. Jadidi, *Int. J. Environ. Sci. Technol.*, 2013, **10**, 1067-1074.
